# Supplementary material
Source: PubMed Central journal article supplement (PMC2572983)
Supplement: 0804086105_0804086105SI.pdf [file 0804086105_0804086105SI.pdf]

# Supporting Information

Masek and Heisenberg 10.1073/pnas.0804086105

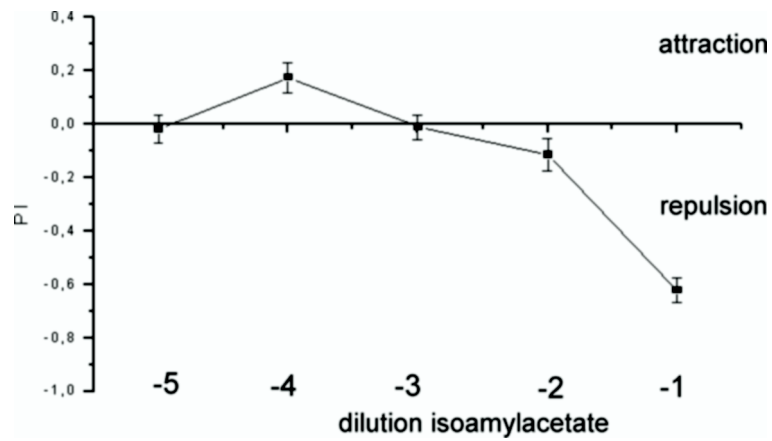

Fig. S1. Dose-response curve for IAA against air of naive WT flies in the T-maze apparatus.
